# Supplementary material for: Raman spectroscopy coupled with principal component analysis to quantitatively analyze four crystallographic phases of explosive CL-20
Source: Royal Society of Chemistry journal article supplement (doi:10.1039/c8ra02189a), 2018-01-01
Supplement: c8ra02189a1.pdf [file c8ra02189a1.pdf]

## Supporting Information

### XRD experiments

Figure S1. XRD patterns of CL-20.

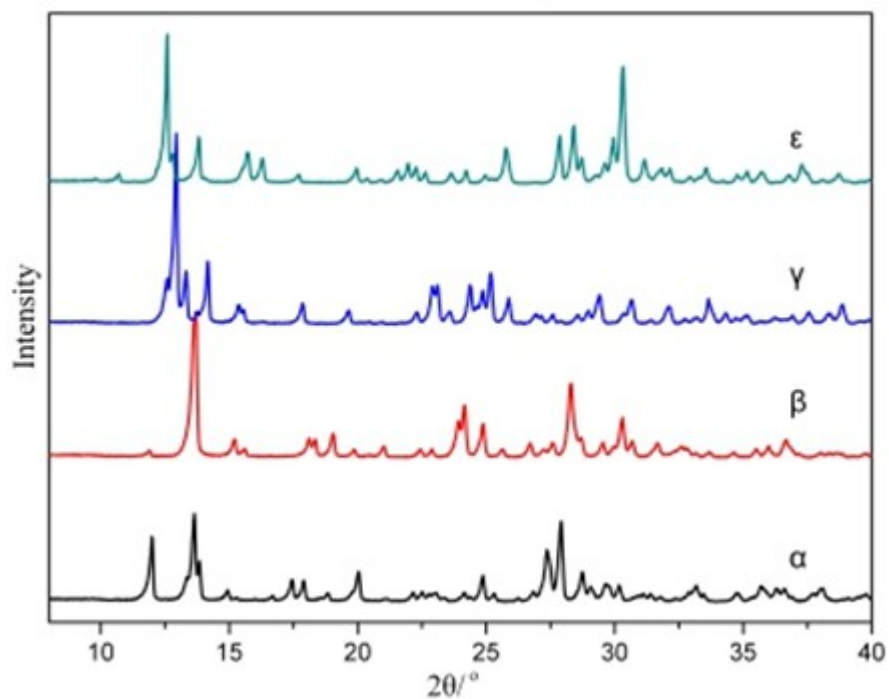

Figure S2. Raman spectra of CL-20.

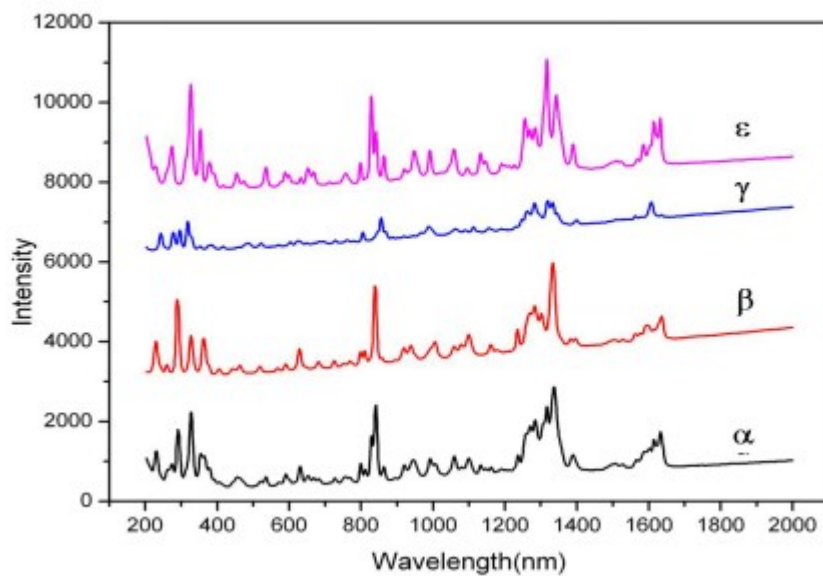

Figure S3. Three-dimensional scattered plot for the PCA-transformed Raman spectra of 50-200  $\text{cm}^{-1}$  region for four phase CL-20.

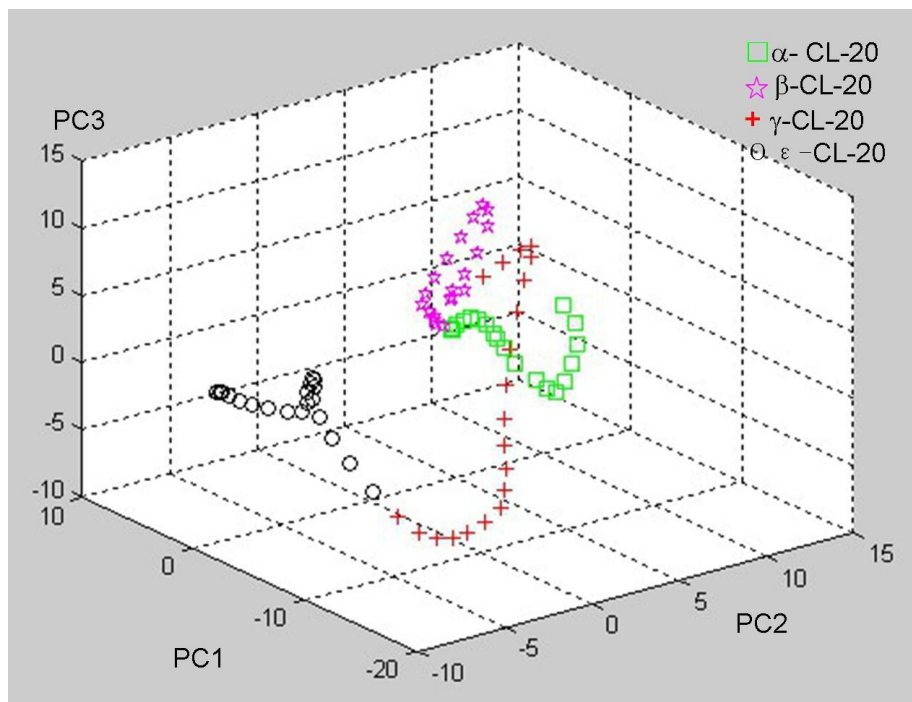

Figure S4. Three-dimensional scattered plot for the PCA-transformed Raman spectra of 200-400  $\text{cm}^{-1}$  region for four phase CL-20.

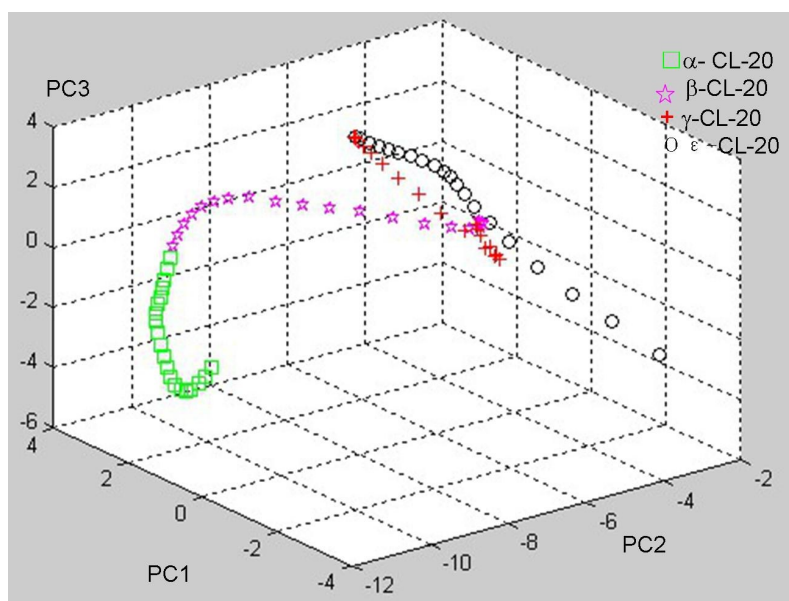

Figure S5. Three-dimensional scattered plot for the PCA-transformed Raman spectra of 400-800  $\text{cm}^{-1}$  region for four phase CL-20.

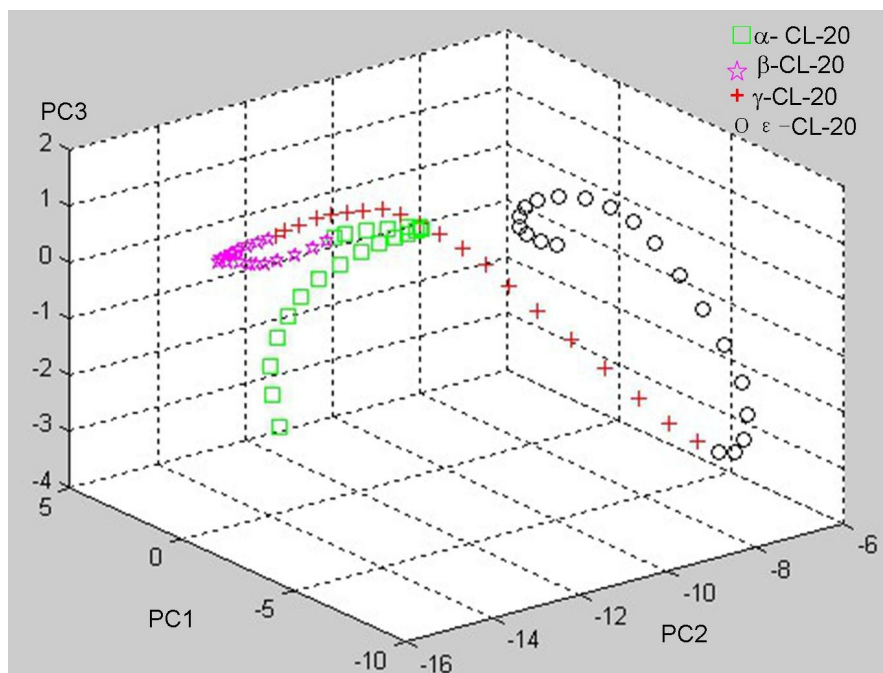

Figure S6. Three-dimensional scattered plot for the PCA-transformed Raman spectra of 1000-1500  $\text{cm}^{-1}$  region for four phase CL-20.

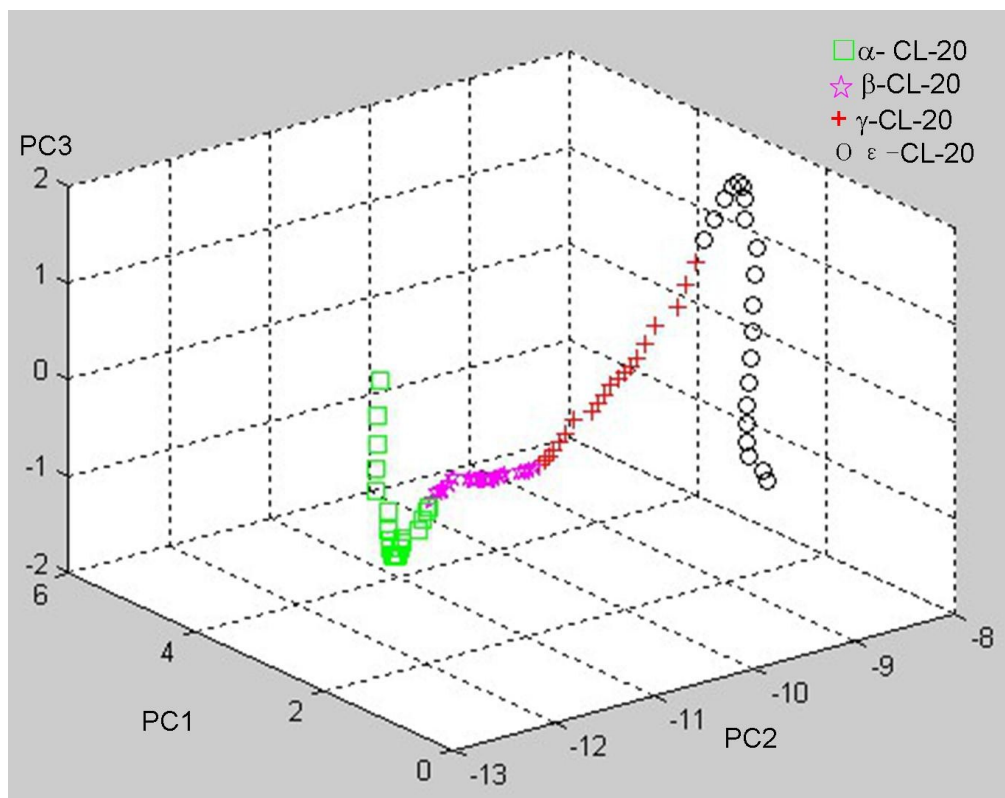

Figure S7. Three-dimensional scattered plot for the PCA-transformed Raman spectra of 1500-2500  $\text{cm}^{-1}$  region for four phase CL-20.

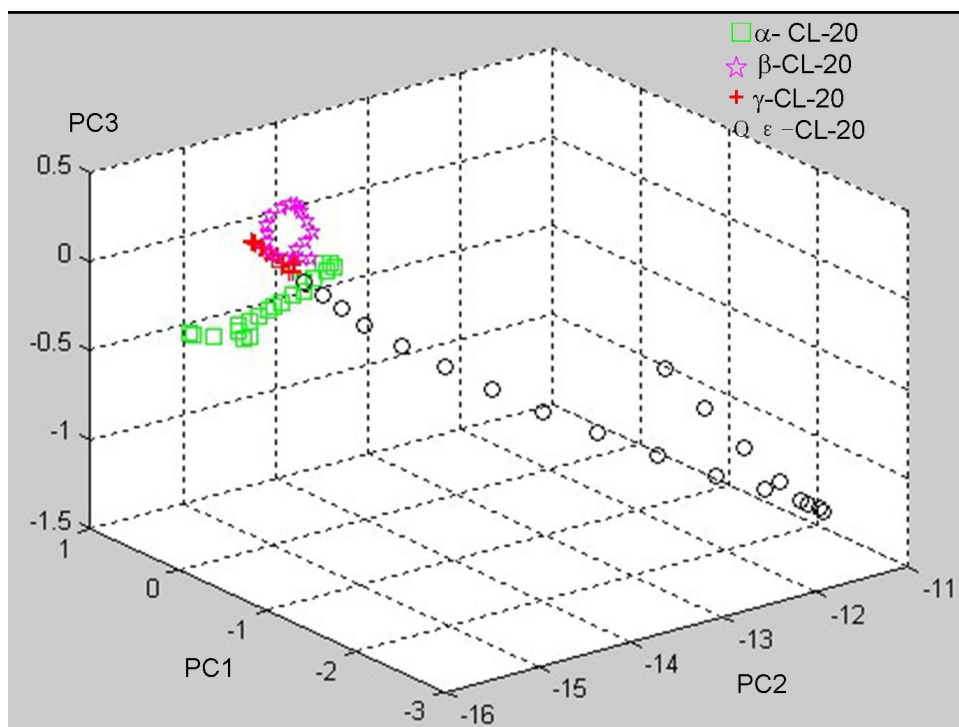

Figure S8. Three-dimensional scattered plot for the PCA-transformed Raman spectra of 2500-3500  $\text{cm}^{-1}$  region for four phase CL-20.

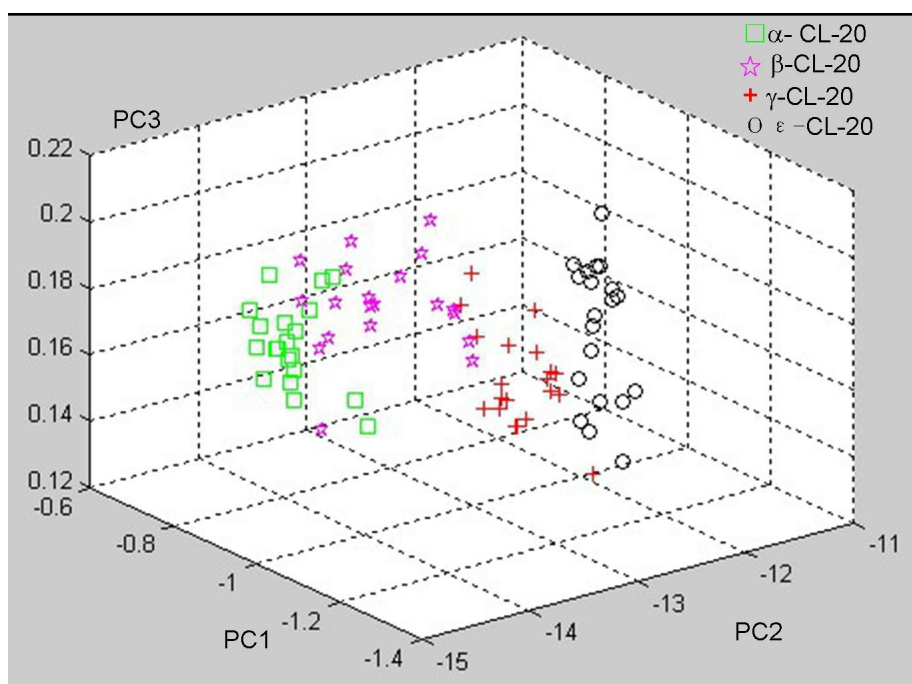

Figure S9. Raman spectra for CL-20 (mixtures of  $\gamma$  and  $\epsilon$ ) in the 50-2000  $\text{cm}^{-1}$  spectral region.

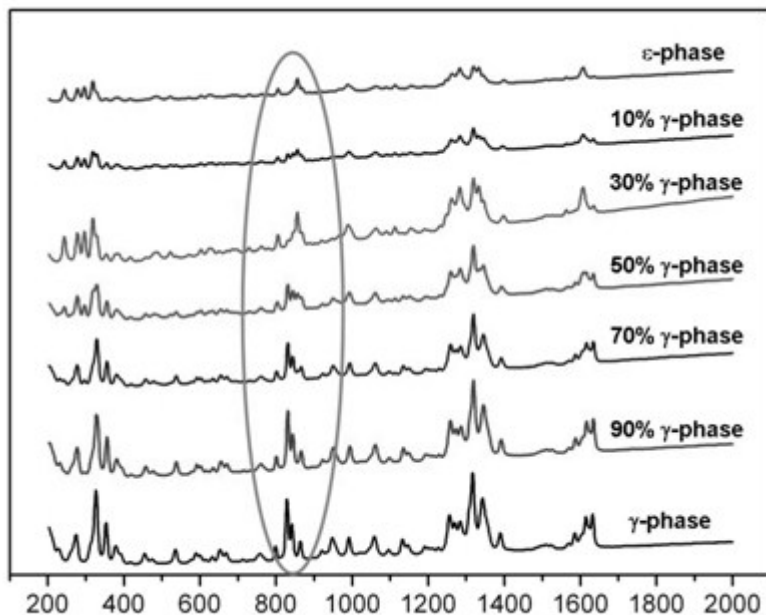

Figure S10. Raman spectra for CL-20 (mixtures of  $\alpha$  and  $\epsilon$ ) in the 50-2000  $\text{cm}^{-1}$  spectral region.

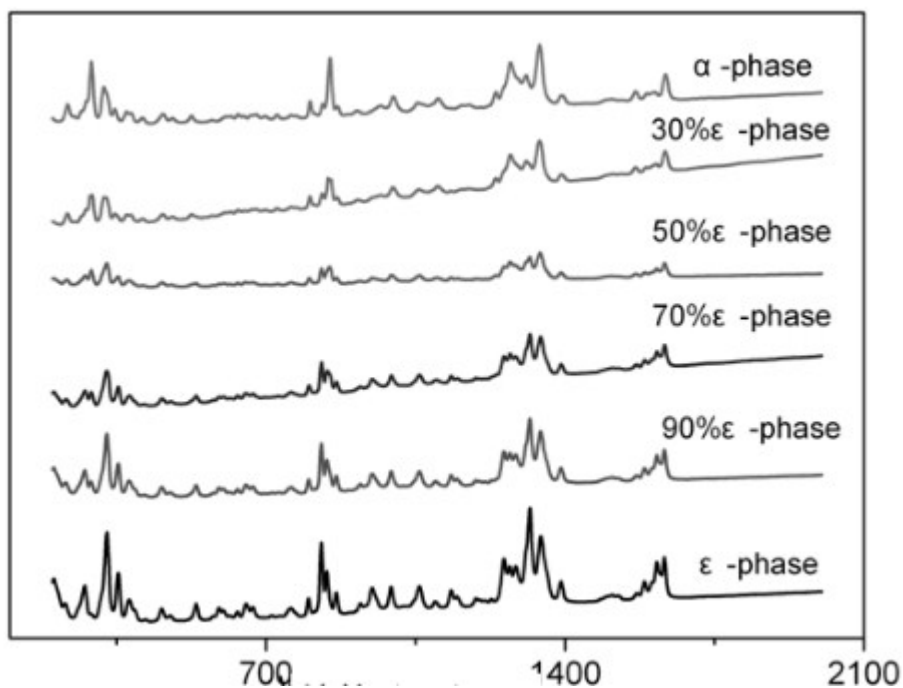

Table S1 Assignments of Raman peaks for CL-20[1]

| Raman Shift/cm <sup>-1</sup> | Vibrational Mode               |
|------------------------------|--------------------------------|
| 250-350                      | CL-20 "Cage" stretch           |
| 810-870                      | Ring stretch<br>NO2 scissoring |
| 1050                         | N-N stretch                    |
| 1200-1400                    | Symmetric NO2 stretch          |
| 1550-1680                    | Anti-symmetric NO2 stretch     |
| 3010-3070                    | C-H stretch                    |

Table S2 the detection sample and deviation

| Sample | Sample quality | The actual proportion %β | The calculation proportion %β | Deviation(+/-) |
|--------|----------------|--------------------------|-------------------------------|----------------|
| A      | 5mg            | 1                        | 0.8                           | 0.2%           |
| B      | 5mg            | 3                        | 3.4                           | 0.4%           |
| C      | 5mg            | 5                        | 4.7                           | 0.3%           |
| D      | 5mg            | 20                       | 19.8                          | 0.2%           |
| E      | 5mg            | 40                       | 38.8                          | 1.2%           |
| F      | 5mg            | 60                       | 59.5                          | 0.5%           |
| G      | 5mg            | 80                       | 83.7                          | 2.7%           |

Table S3 the detection sample and deviation

| Sample | Sample quality | The actual proportion % $\epsilon$ | The calculation proportion % $\epsilon$ | Deviation(+/-) |
|--------|----------------|------------------------------------|-----------------------------------------|----------------|
| A      | 5mg            | 10                                 | 8.2                                     | 1.8%           |
| B      | 5mg            | 30                                 | 28.9                                    | 1.1%           |
| C      | 5mg            | 50                                 | 48.8                                    | 1.2%           |
| D      | 5mg            | 70                                 | 69.0                                    | 1.0%           |
| E      | 5mg            | 90                                 | 90.8                                    | 0.8%           |
| A      | 5mg            | 10                                 | 8.2                                     | 1.8%           |
| B      | 5mg            | 30                                 | 28.9                                    | 1.1%           |

Table S4 the detection sample and deviation

| Sample | Sample quality | The actual proportion % $\epsilon$ | The calculation proportion % $\epsilon$ | Deviation(+/-) |
|--------|----------------|------------------------------------|-----------------------------------------|----------------|
| A      | 5mg            | 10                                 | 8.4                                     | 1.6%           |
| B      | 5mg            | 30                                 | 29.7                                    | 0.3%           |
| C      | 5mg            | 50                                 | 48.3                                    | 1.7%           |
| D      | 5mg            | 70                                 | 72.5                                    | 2.5%           |
| E      | 5mg            | 90                                 | 89.2                                    | 0.8%           |
| A      | 5mg            | 10                                 | 8.4                                     | 1.6%           |
| B      | 5mg            | 30                                 | 29.7                                    | 0.3%           |

## **Reference**

- [1] P. Goede, N. V. Latypov, H. Östmark, Propellants, Explosives, Pyrotechnics 2004, **29**, 205-208.
